# Supplementary material
Source: HighWire-hosted journal article supplement (https://cmaj.ca/highwire/filestream/77579/field_highwire_adjunct_files/1/200645-res-2-at.pdf)
Supplement: 200645-res-2-at.pdf [file 200645-res-2-at.pdf]

## Appendix 2 (as supplied by the authors): Search strategy

### 1. ARDS

#### 1.1 Search strategy for systematic reviews

**Database: OVID Medline Epub Ahead of Print, In-Process & Other Non-Indexed Citations, Ovid MEDLINE(R) Daily and Ovid MEDLINE(R) 1946 to Present**

Search Strategy:

- 1 exp Adrenal Cortex Hormones/ (391670)
- 2 (steroid\* or corticosteroid\* or glucocorticoid\* or hydroxycorticosteroid\* or methylpredniso\* or hydrocortison\*).mp. [mp=title, abstract, original title, name of substance word, subject heading word, floating sub-heading word, keyword heading word, organism supplementary concept word, protocol supplementary concept word, rare disease supplementary concept word, unique identifier, synonyms] (556784)
- 3 1 or 2 (719668)
- 4 Respiratory Distress Syndrome, Adult/ (18884)
- 5 Acute Lung Injury/ (5971)
- 6 (((acute or adult or severe) and (respiratory adj1 distress)) or ards).mp. [mp=title, abstract, original title, name of substance word, subject heading word, floating sub-heading word, keyword heading word, organism supplementary concept word, protocol supplementary concept word, rare disease supplementary concept word, unique identifier, synonyms] (38224)
- 7 ((acute adj1 lung\* adj1 injur\*) or (shock adj1 lung\*)).mp. [mp=title, abstract, original title, name of substance word, subject heading word, floating sub-heading word, keyword heading word, organism supplementary concept word, protocol supplementary concept word, rare disease supplementary concept word, unique identifier, synonyms] (14961)
- 8 or/4-7 (47700)
- 9 3 and 8 (3349)
- 10 systematic review.mp. or "Systematic Review"/ (169706)

- 11 MEDLINE.tw. (113047)
- 12 meta-analysis.pt. (110665)
- 13 intervention\$.ti. (143782)
- 14 or/10-13 (403906)
- 15 9 and 14 (103)

**Database: Embase <1974 to 2020 February 14>**

Search Strategy:

- 1 exp corticosteroid/ (902689)
- 2 (steroid\* or corticosteroid\* or glucocorticoid\* or hydroxycorticosteroid\* or methylpredniso\* or hydrocortison\*).mp. [mp=title, abstract, heading word, drug trade name, original title, device manufacturer, drug manufacturer, device trade name, keyword, floating subheading word, candidate term word] (912650)
- 3 1 or 2 (1232593)
- 4 adult respiratory distress syndrome/ (34967)
- 5 respiratory distress syndrome/ (13658)
- 6 exp acute lung injury/ (14541)
- 7 (((acute or adult or severe) and (respiratory adj1 distress)) or ards).mp. (70101)
- 8 ((acute adj1 lung\* adj1 injur\*) or (shock adj1 lung\*)).mp. (24488)
- 9 or/4-8 (94334)
- 10 3 and 9 (13577)
- 11 MEDLINE.tw. (140038)
- 12 systematic review.mp. (300580)
- 13 exp meta analysis/ (181123)
- 14 intervention\$.ti. (192248)
- 15 or/11-14 (605606)
- 16 10 and 15 (498)

**Cochrane Library CDSR**

Date Run: 19/02/2020 05:00:38

ID Search Hits

- #1 MeSH descriptor: [Adrenal Cortex Hormones] explode all trees 14145
- #2 steroid\* or corticosteroid\* or glucocorticoid\* or hydrocorticosteroid\* or methylprednisolone\* or hydrocortisone\* 64053
- #3 #1 or #2 66038
- #4 MeSH descriptor: [Respiratory Distress Syndrome, Adult] explode all trees 1238
- #5 MeSH descriptor: [Acute Lung Injury] explode all trees 396
- #6 (acute or adult) and (respiratory near distress) 3988
- #7 (acute near lung near injur\*) or (shock near lung) 1334
- #8 #4 or #5 or #6 or #7 4576
- #9 #3 and #8 in Cochrane Reviews 160

### **Epistemonikos**

<https://www.epistemonikos.org/en/matrixes/579ac76cd8307f16de30786a>

### **1.2 Search strategy for RCTs**

**Database: Ovid MEDLINE(R) <1996 to February 25, 2020>**

Search Strategy:

- 1 exp Respiratory Distress Syndrome, Adult/ or Respiratory Distress Syndrome.mp. (41863)
- 2 (((acute or adult) and (respiratory adj1 distress)) or ards).mp. (106715)
- 3 exp Acute Lung Injury/ (6030)
- 4 ((acute adj1 lung\* adj1 injur\*) or (shock adj1 lung\*)).mp. (39860)
- 5 1 or 2 or 3 or 4 (141686)
- 6 ((randomized controlled trial or controlled clinical trial).pt. or random\*.ab. or placebo.ab. or clinical trials as topic.sh. or trial.ti.) not (exp animals/ not humans.sh.) (1395666)
- 7 5 and 6 (4909)
- 8 corticosteroid\*.mp. (335634)
- 9 7 and 8 (315)
- 10 2019 to February 25, 2020 (25)

Appendix to: Ye Z, Wang Y, Colunga-Lozano LE, et al. Efficacy and safety of corticosteroids in COVID-19 based on evidence for COVID-19, other coronavirus infections, influenza, community-acquired pneumonia and acute respiratory distress syndrome: a systematic review and meta-analysis. *CMAJ* 2020. doi: 10.1503/cmaj.200645. Copyright © 2020 Joule Inc. or its licensors

**Database: Embase <Inception to March 5th, 2020>**

Search Strategy:

1. 'adult respiratory distress syndrome'/exp OR 'adult respiratory distress syndrome'
2. adult AND respiratory AND distress AND syndrome:ti,ab
3. acute AND respiratory AND distress AND syndrome:ti,ab
4. ards:ti,ab
5. #1 OR #2 OR #3 OR #4
6. 'steroid'/exp
7. steroid\*:ti,ab
8. 'corticosteroid'/exp
9. #6 OR #7 OR #8
10. 'randomized controlled trial'/exp OR 'single blind procedure'/exp OR 'double blind procedure'/exp OR 'crossover procedure'/exp
11. #5 AND #9 AND #10 (219)
12. 2018 to March 5, 2020 (27)

**Clinicaltrials.gov <Inception to March 5th, 2020>**

(Corticosteroids OR steroids) AND Acute Distress Respiratory Syndrome (17)

**2. COVID-19, SARS, and MERS**

**1) search up to March 20, 2020**

**Database: OVID Medline Epub Ahead of Print, In-Process & Other Non-Indexed Citations, Ovid MEDLINE(R) Daily and Ovid MEDLINE(R) 1946 to Present**

Search Strategy:

- 1 exp Coronavirus/ (11361)
- 2 exp Coronavirus Infections/ (9639)
- 3 (coronavir\* or coronovir\* or SARS or MERS or MERS-COV or SARS-COV or SARS-COV-2 or COV or NCOV or 2019nCOV or 2019-nCOV or COVID-19).mp.  
[mp=title, abstract, original title, name of substance word, subject heading word,

floating sub-heading word, keyword heading word, organism supplementary concept word, protocol supplementary concept word, rare disease supplementary concept word, unique identifier, synonyms] (23815)

4 or/1-3 (26162)

5 exp Adrenal Cortex Hormones/ (392727)

6 (steroid\* or corticosteroid\* or glucocorticoid\* or hydrocorticosteroid\* or methylpredniso\* or hydrocortison\*).mp. [mp=title, abstract, original title, name of substance word, subject heading word, floating sub-heading word, keyword heading word, organism supplementary concept word, protocol supplementary concept word, rare disease supplementary concept word, unique identifier, synonyms] (558465)

7 5 or 6 (721635)

8 4 and 7 (485)

**Database: Embase <1974 to 2020 March 19>**

Search Strategy:

1 exp coronavirinae/ (10978)

2 exp Coronavirus infection/ (11075)

3 (coronavir\* or coronovir\* or SARS or MERS or MERS-COV or SARS-COV or SARS-COV-2 or COV or NCOV or 2019nCOV or 2019-nCOV or COVID-19).mp. [mp=title, abstract, heading word, drug trade name, original title, device manufacturer, drug manufacturer, device trade name, keyword, floating subheading word, candidate term word] (28593)

4 or/1-3 (32832)

5 exp corticosteroid/ (907250)

6 (steroid\* or corticosteroid\* or glucocorticoid\* or hydrocorticosteroid\* or methylpredniso\* or hydrocortison\*).mp. [mp=title, abstract, heading word, drug trade name, original title, device manufacturer, drug manufacturer, device trade name, keyword, floating subheading word, candidate term word] (917769)

7 5 or 6 (1239170)

8 4 and 7 (1220)

## Cochrane Library

Date Run: 20/03/2020 19:41:49

ID Search Hits

- #1 MeSH descriptor: [Coronavirus] explode all trees 11
- #2 MeSH descriptor: [Coronavirus Infections] explode all trees 12
- #3 (coronavir\* or coronovir\* or SARS or MERS or "MERS-COV" or "SARS-COV" or "SARS-COV-2" or COV or NCOV or "2019nCOV" or "2019-nCOV" or "COVID-19"):ti,ab,kw (Word variations have been searched) 1235
- #4 MeSH descriptor: [Adrenal Cortex Hormones] explode all trees 14100
- #5 (steroid\* or corticosteroid\* or glucocorticoid\* or hydroxycorticosteroid\* or methylpredniso\* or hydrocortison\*):ti,ab,kw (Word variations have been searched) 60429
- #6 #4 or #5 62421
- #7 #1 or #2 or #3 1235
- #8 #6 and #7 in Trials 136

## PubMed

Search (((((((coronavir\* or coronovir\* or SARS or MERS or MERS-COV or SARS-COV or SARS-COV-2 or COV or NCOV or 2019nCOV or 2019-nCOV or COVID-19))) AND ((steroid\* or corticosteroid\* or glucocorticoid\* or hydroxycorticosteroid\* or methylpredniso\* or hydrocortison\*)))) AND (((publisher[sb] OR inprocess[sb] OR pubmednotmedline[sb] OR pubstatusaheadofprint)))))) Sort by: PublicationDate  
39

## Chinese Databases (CNKI, WanFang and CQVIP)

156

medRxiv search March 20, 2020

[https://www.medrxiv.org/search/coronavir%252A%252Bor%252Bcoronavir%252A%252Bor%252BSARS%252Bor%252BMERS%252Bor%252BMERS-COV%252Bor%252BSARS-COV%252Bor%252BSARS-COV-2%252B%252Bor%252BCOV%252Bor%252BNCOV%252Bor%252B2019nCOV%](https://www.medrxiv.org/search/coronavir%252A%252Bor%252Bcoronavir%252A%252Bor%252BSARS%252Bor%252BMERS%252Bor%252BMERS-COV%252Bor%252BSARS-COV%252Bor%252BSARS-COV-2%252B%252Bor%252BCOV%252Bor%252BNCOV%252Bor%252B2019nCOV%252B)

[252Bor%252B2019-nCOV%252Bor%252BCOVID%20jcode%3Amedrxiv%20numresults%3A75%20sort%3Arelevance-rank%20format\\_result%3Astandard?page=1](#)  
results= 507

## 2) search from March, 2020 to April 19, 2020

**Database: OVID Medline Epub Ahead of Print, In-Process & Other Non-Indexed Citations, Ovid MEDLINE(R) Daily and Ovid MEDLINE(R) 1946 to Present**

Search Strategy:

- 1 exp Coronavirus/ (12243)
- 2 exp Coronavirus Infections/ (10626)
- 3 (coronavir\* or coronovir\* or SARS or MERS or MERS-COV or SARS-COV or SARS-COV-2 or COV or NCOV or 2019nCOV or 2019-nCOV or COVID-19).mp. [mp=title, abstract, original title, name of substance word, subject heading word, floating sub-heading word, keyword heading word, organism supplementary concept word, protocol supplementary concept word, rare disease supplementary concept word, unique identifier, synonyms] (28455)
- 4 or/1-3 (30798)
- 5 exp Adrenal Cortex Hormones/ (393430)
- 6 (steroid\* or corticosteroid\* or glucocorticoid\* or hydrocorticosteroid\* or methylpredniso\* or hydrocortison\*).mp. [mp=title, abstract, original title, name of substance word, subject heading word, floating sub-heading word, keyword heading word, organism supplementary concept word, protocol supplementary concept word, rare disease supplementary concept word, unique identifier, synonyms] (559983)
- 7 5 or 6 (723346)
- 8 4 and 7 (554)
- 9 (coronavir\* or coronovir\* or SARS-COV or SARS-COV-2 or COV or NCOV or 2019nCOV or 2019-nCOV or COVID-19).mp. [mp=title, abstract, original title, name of substance word, subject heading word, floating sub-heading word, keyword

heading word, organism supplementary concept word, protocol supplementary concept word, rare disease supplementary concept word, unique identifier, synonyms] (20970)

10 1 or 2 or 9 (25514)

11 7 and 10 (470)

12 limit 11 to ed=20200315-20200419 (15)

**Database: Embase <1974 to 2020 April 17>**

Search Strategy:

1 exp coronavirinae/ (12615)

2 exp Coronavirus infection/ (11918)

3 (coronavir\* or coronovir\* or SARS or MERS or MERS-COV or SARS-COV or SARS-COV-2 or COV or NCOV or 2019nCOV or 2019-nCOV or COVID-19).mp. [mp=title, abstract, heading word, drug trade name, original title, device manufacturer, drug manufacturer, device trade name, keyword, floating subheading word, candidate term word] (31767)

4 or/1-3 (36029)

5 (coronavir\* or coronovir\* or SARS-COV or SARS-COV-2 or COV or NCOV or 2019nCOV or 2019-nCOV or COVID-19).mp. [mp=title, abstract, heading word, drug trade name, original title, device manufacturer, drug manufacturer, device trade name, keyword, floating subheading word, candidate term word] (24150)

6 exp corticosteroid/ (911020)

7 (steroid\* or corticosteroid\* or glucocorticoid\* or hydrocorticosteroid\* or methylprednisolone\* or hydrocortisone\*).mp. (921603)

8 6 or 7 (1244325)

9 1 or 2 or 5 (30677)

10 8 and 9 (1183)

11 limit 10 to em=202008-202052 (107)

**Cochrane Library**

Search Strategy:

ID Search Hits



- #1 MeSH descriptor: [Coronavirus] explode all trees 11
- #2 MeSH descriptor: [Coronavirus Infections] explode all trees 38
- #3 ((coronavir\* or coronovir\* or SARS or MERS or "MERS-COV" or "SARS-COV" or "SARS-COV-2" or COV or NCOV or "2019nCOV" or "2019-nCOV" or "COVID-19")):ti,ab,kw (Word variations have been searched) 1286
- #4 #1 or #2 or #3 1286
- #5 (coronavir\* or coronovir\* or "SARS-COV" or "SARS-COV-2" or COV or NCOV or 2019nCOV or "2019-nCOV" or "COVID-19"):ti,ab,kw (Word variations have been searched) 223
- #6 #1 or #2 or #4 1286
- #7 MeSH descriptor: [Adrenal Cortex Hormones] explode all trees 14135
- #8 steroid\* or corticosteroid\* or glucocorticoid\* or hydroxycorticosteroid\* or methylpredniso\* or hydrocortison\* 62705
- #9 #7 or #8 64682
- #10 #6 and #9 in Trials 138
- #11 #10 with Cochrane Library publication date in The last 3 months 8

### **Chinese Databases**

CNKI, WanFang, CQVIP (108)

ChinaXiv (4)

### **medRxiv**

<https://connect.medrxiv.org/relate/content/181?page=1>

n=2272

## **3. Influenza**

### **3.1 Search strategy for systematic reviews**

**Database: OVID Medline Epub Ahead of Print, In-Process & Other Non-Indexed Citations, Ovid MEDLINE(R) Daily and Ovid MEDLINE(R) 1946 to Present**

Search Strategy:

1 Influenza, Human/ (48134)

2 exp Influenzavirus A/ (43096)  
 3 exp Influenzavirus B/ (4199)  
 4 (influenza\* or flu).tw. (120758)  
 5 (h1n1 or h5n1 or h3n2).tw. (24960)  
 6 or/1-5 (128402)  
 7 exp Adrenal Cortex Hormones/ (392230)  
 8 (steroid\* or corticosteroid\* or glucocorticoid\* or hydroxycorticosteroid\* or  
 methylpredniso\* or hydrocortison\*).mp. [mp=title, abstract, original title, name of  
 substance word, subject heading word, floating sub-heading word, keyword heading  
 word, organism supplementary concept word, protocol supplementary concept word,  
 rare disease supplementary concept word, unique identifier, synonyms] (557136)  
 9 7 or 8 (720173)  
 10 systematic review.mp. or "Systematic Review"/ (169979)  
 11 MEDLINE.tw. (113116)  
 12 meta-analysis.pt. (111566)  
 13 intervention\$.ti. (143893)  
 14 or/10-13 (404471)  
 15 6 and 9 and 14 (50)

**Database: Embase <1974 to 2020 March 05>**

Search Strategy:

1 exp influenza/ (83541)  
 2 exp Influenza virus A/ (11786)  
 3 exp influenza b virus/ (1300)  
 4 (influenza\* or flu).tw. (139529)  
 5 (h1n1 or h5n1 or h3n2).tw. (30744)  
 6 or/1-5 (159825)  
 7 exp corticosteroid/ (905900)  
 8 (steroid\* or corticosteroid\* or glucocorticoid\* or hydroxycorticosteroid\* or  
 methylpredniso\* or hydrocortison\*).mp. [mp=title, abstract, heading word, drug trade

name, original title, device manufacturer, drug manufacturer, device trade name, keyword, floating subheading word, candidate term word] (916295)

- 9 7 or 8 (1237250)
- 10 MEDLINE.tw. (140913)
- 11 systematic review.mp. (303491)
- 12 exp meta analysis/ (182677)
- 13 intervention\$.ti. (193520)
- 14 or/10-13 (610158)
- 15 6 and 9 (8235)
- 16 14 and 15 (294)

### **Cochrane**

Date Run: 07/03/2020 02:23:00

ID Search Hits

- #1 MeSH descriptor: [Adrenal Cortex Hormones] explode all trees 14102
- #2 MeSH descriptor: [Hydrocortisone] explode all trees 5872
- #3 MeSH descriptor: [Cortisone] explode all trees 143
- #4 MeSH descriptor: [Steroids] explode all trees 57349
- #5 corticosteroid\* or steroid\* or cortison\* or hydrocortison\* 56761
- #6 methylprednisolon\* or (methyl next prednisolon\*) or betamethason\* or dexamethason\* or glucocorticoid\* or fludrocortison\* or mineralocorticoid\* 26332
- #7 #1 or #2 or #3 or #4 or #5 or #6 108317
- #8 MeSH descriptor: [Influenza, Human] explode all trees 2595
- #9 MeSH descriptor: [Influenzavirus B] explode all trees 274
- #10 MeSH descriptor: [Influenzavirus A] explode all trees 840
- #11 influenza\* or flu 11390
- #12 h1n1 or h5n1 or h3n2 1787
- #13 #8 or #9 or #10 or #11 or #12 11402
- #14 #7 and #13 in Cochrane Reviews 172

### **Epistemonikos**

Appendix to: Ye Z, Wang Y, Colunga-Lozano LE, et al. Efficacy and safety of corticosteroids in COVID-19 based on evidence for COVID-19, other coronavirus infections, influenza, community-acquired pneumonia and acute respiratory distress syndrome: a systematic review and meta-analysis. *CMAJ* 2020. doi: 10.1503/cmaj.200645. Copyright © 2020 Joule Inc. or its licensors

[https://www.epistemonikos.org/advanced\\_search?q=influenza%20steroids&protocol=no&classification=systematic-review](https://www.epistemonikos.org/advanced_search?q=influenza%20steroids&protocol=no&classification=systematic-review)

### 3.2 Search strategy for primary studies

**Database: OVID Medline Epub Ahead of Print, In-Process & Other Non-Indexed Citations, Ovid MEDLINE(R) Daily and Ovid MEDLINE(R) 1946 to Present**

Search Strategy:

- 1 Influenza, Human/ (48151)
- 2 exp influenzavirus a/ or exp influenzavirus b/ (44047)
- 3 (influenza\* or flu).tw. (120977)
- 4 (h1n1 or h5n1 or h3n2).tw. (25017)
- 5 or/1-4 (128627)
- 6 exp Adrenal Cortex Hormones/ (392289)
- 7 (steroid\* or corticosteroid\* or glucocorticoid\* or hydroxycorticosteroid\* or methylpredniso\* or hydrocortison\*).mp. [mp=title, abstract, original title, name of substance word, subject heading word, floating sub-heading word, keyword heading word, organism supplementary concept word, protocol supplementary concept word, rare disease supplementary concept word, unique identifier, synonyms] (557603)
- 8 6 or 7 (720650)
- 9 5 and 8 (2090)
- 10 limit 9 to yr="2018 -Current" (240)

**Database: Embase <1974 to 2020 March 09>**

Search Strategy:

- 1 exp influenza/ (83575)
- 2 exp influenzavirus a/ (11794)
- 3 exp influenzavirus b/ (1313)
- 4 (h1n1 or h5n1 or h3n2).tw. (30740)
- 5 (influenza\* or flu).tw. (139504)
- 6 or/1-5 (159828)

- 7 exp corticosteroid/ (906248)  
 8 (steroid\* or corticosteroid\* or glucocorticoid\* or hydrocorticosteroid\* or methylprednisol\* or hydrocortison\*).mp. (916575)  
 9 7 or 8 (1237659)  
 10 6 and 9 (8239)  
 11 limit 10 to yr="2018 -Current" (1120)

## Central

Date Run: 10/03/2020 19:16:35

ID Search Hits

- #1 Adrenal Cortex Hormones 2377  
 #2 MeSH descriptor: [Adrenal Cortex Hormones] explode all trees 14102  
 #3 MeSH descriptor: [Hydrocortisone] explode all trees 5872  
 #4 MeSH descriptor: [Cortisone] explode all trees 143  
 #5 MeSH descriptor: [Steroids] explode all trees 57349  
 #6 corticosteroid\* or steroid\* or cortison\* or hydrocortison\* 56764  
 #7 methylprednisolon\* or (methyl next prednisolon\*) or betamethason\* or dexamethason\* or glucocorticoid\* or fludrocortison\* or mineralocorticoid\* 26333  
 #8 #1 or #2 or #3 or #4 or #5 or #6 98512  
 #9 MeSH descriptor: [Influenza, Human] explode all trees 2595  
 #10 MeSH descriptor: [Influenzavirus B] explode all trees 274  
 #11 MeSH descriptor: [Influenzavirus A] explode all trees 840  
 #12 influenza\* or flu 11391  
 #13 h1n1 or h5n1 or h3n2 1787  
 #14 #9 or #10 or #11 or #12 or #13 11403  
 #15 #8 and #14 with Cochrane Library publication date Between Jan 2018 and Dec 2020, in Trials 174

## PubMed

Search (((flu or influenza))) AND ((corticosteroid\* or steroid\* or cortison\* or hydrocortison\* or methylprednisolon\* or betamethason\* or dexamethason\* or

glucocorticoid\* or fludrocortison\* or mineralocorticoid\*)) AND (((publisher[sb] OR inprocess[sb] OR pubmednotmedline[sb] OR pubstatusaheadofprint))) Sort by: PublicationDate 183

#### **4. CAP**

##### **4.1 Search strategy for systematic reviews**

**Database: Ovid MEDLINE(R) <1996 to February 25, 2020>**

Search Strategy:

1. exp Pneumonia/ (90140)
2. meta analysis[Publication Type] (533416)
3. corticosteroid\*.tw,nm. (334604)
4. 6 and 7 and 10 (56 studies)

**Database: Embase <1996 to February 29, 2020>**

Search Strategy:

1. 'pneumonia'/exp OR 'pneumonia' (314,788)
2. 'corticosteroid'/exp OR 'corticosteroid' (990,900)
3. 'meta analysis' (271,175)
4. #1 AND #2 AND #3 (681 studies)

**Database: Cochrane CDSR <inception to March 5th>**

Search strategy:

"community acquired pneumonia" in All Text AND "corticosteroid" in All Text - (Word variations have been searched) (13 studies)

**Database: Epistemonikos < inception to March 5th>**

Search strategy

(title:((title:(Pneumonia) OR abstract:(Pneumonia)) AND corticosteroid) OR abstract:((title:(Pneumonia) OR abstract:(Pneumonia)) AND corticosteroid AND Systematic review)) (63 studies)

##### **4.2 Search strategy for RCTs**

**Database: Ovid MEDLINE <1996 to February 29, 2020>**

Search Strategy:

1. exp Pneumonia/ (90135)
2. pneumon\*.tw. (469756)
3. bronchopneumon\*.tw. (9843)
4. pleuropneumon\*.tw. (4341)
5. CAP.tw. (136325)
6. HAP.tw. (10024)
7. Respiratory Distress Syndrome, Adult/ (18933)
8. adult respiratory distress syndrome.tw. (13472)
9. acute respiratory distress syndrome.tw. (42083)
10. ARDS.tw. (33922)
11. or/1-10 (689340)
12. exp Steroids/ (847223)
13. steroid\*.tw,nm. (695213)
14. exp Adrenal Cortex Hormones/ (392087)
15. adrenal cortex hormone\*.tw,nm. (64420)
16. corticosteroid\*.tw,nm. (334508)
17. corticoid\*.tw,nm. (11648)
18. glucocorticoid\*.tw,nm. (205891)
19. glucocorticosteroid\*.tw,nm. (9732)
20. pregnenedione\*.tw,nm. (2192)
21. pregnenolone\*.tw,nm. (11146)
22. hydrocortisone.tw,nm. (107838)
23. hydroxypregnenolone.tw,nm. (1598)
24. hydroxycorticosteroid\*.tw,nm. (7133)
25. tetrahydrocortisol.tw,nm. (888)
26. cortodoxone.tw,nm. (858)
27. cortisone.tw,nm. (33020)

28. fludrocortisone.tw,nm. (5744)
29. corticosterone.tw,nm. (52490)
30. triamcinolone.tw,nm. (28528)
31. prednisone.tw,nm. (145872)
32. prednisolone.tw,nm. (111350)
33. paramethasone.tw,nm. (288)
34. methylprednisolone.tw,nm. (77978)
35. dexamethasone.tw,nm. (159549)
36. clobetasol.tw,nm. (6425)
37. beclomethasone.tw,nm. (9816)
38. betamethasone.tw,nm. (19815)
39. budesonide.tw,nm. (19461)
40. (efcortisol or hydrocortone or solu-cortef).tw,nm. (255)
41. (betnelan or betnesol).tw,nm. (172)
42. (deflazacort or calcort).tw,nm. (1626)
43. (medrone or solu-medrone or depo-medrone).tw,nm. (147)
44. kenalog.tw,nm. (1515)
45. (novolizer or pulmicort or symbicort).tw,nm. (1555)
46. (beclometasone or aerobec or asmabec or beclazone or becodisks or becotide or clenil modulite or qvar or becloforte).tw,nm. (1460)
47. cortisol.tw,nm. (126950)
48. or/12-47 (1965836)
49. 11 and 48 (97926)
50. ((randomized controlled trial or controlled clinical trial).pt. or random\*.ab. or placebo.ab. or clinical trials as topic.sh. or trial.ti.) not (exp animals/ not humans.sh.) (1173)
51. limit 2015 to current (377)

**Database: Embase <1996 to February 29, 2020>**

Search Strategy:



#56 #55 AND limit 2015 to current (1576)  
#55 #51 AND #54 (4,883)  
#54 #52 OR #53  
#53 random\*:ab,ti OR placebo\*:ab,ti OR factorial\*:ab,ti OR crossover\*:ab,ti OR  
'cross-over':ab,ti OR 'cross over':ab,ti OR assign\*:ab,ti OR  
allocat\*:ab,ti OR volunteer\*:ab,ti OR ((singl\* OR doubl\*) NEAR/2 (blind\* OR  
mask\*)):ab,ti  
#52 'randomized controlled trial'/exp OR 'single blind procedure'/exp OR 'double blind  
procedure'/exp OR 'crossover procedure'/exp  
#51 #11 AND #50  
#50 #12 OR #13 OR #14 OR #15 OR #16 OR #17 OR #18 OR #19 OR #20 OR #21  
OR #22 OR #23 OR #24 OR #25 OR #26 OR #27 OR #28 OR  
#29 OR #30 OR #31 OR #32 OR #33 OR #34 OR #35 OR #36 OR #37 OR #38 OR  
#39 OR #40 OR #41 OR #42 OR #43 OR #44 OR #45 OR #46  
OR #47 OR #48 OR #49  
#49 cortisol:ti,ab  
#48 beclometasone:ti,ab OR aerobec:ti,ab OR asmabec:ti,ab OR beclazone:ti,ab OR  
becodisks:ti,ab OR becotide:ti,ab OR clenil:ti,ab AND  
modulite:ti,ab OR qvar:ti,ab OR becloforte:ti,ab  
#47 novolizer:ti,ab OR pulmicort:ti,ab OR symbicort:ti,ab  
#46 kenalog:ti,ab  
#45 medrone:ti,ab OR 'solu medrone':ti,ab OR 'depo medrone':ti,ab  
#44 deflazacort:ti,ab OR calcort:ti,ab  
#43 betnelan:ti,ab OR betnesol:ti,ab  
#42 efcortisol:ti,ab OR hydrocortone:ti,ab OR 'solu cortef':ti,ab  
#41 budesonide:ti,ab  
#40 betamethasone:ti,ab  
#39 beclomethasone:ti,ab  
#38 clobetasol:ti,ab

#37 dexamethasone:ti,ab  
#36 methylprednisolone:ti,ab  
#35 paramethasone:ti,ab  
#34 prednisolone:ti,ab  
#33 prednisone:ti,ab  
#32 triamcinolone:ti,ab  
#31 corticosterone:ti,ab  
#30 fludrocortisone:ti,ab  
#29 cortisone:ti,ab  
#28 'cortodoxone'/de  
#27 cortodoxone:ti,ab  
#26 tetrahydrocortisol:ti,ab  
#25 hydroxycorticosteroid\*:ti,ab  
#24 hydroxypregnenolone:ti,ab  
#23 hydrocortisone:ti,ab  
#22 pregnenolone\*:ti,ab  
#21 pregnenedione\*:ti,ab  
#20 'pregnane derivative'/de  
#19 glucocorticosteroid\*:ti,ab  
#18 glucocorticoid\*:ti,ab  
#17 corticoid\*:ti,ab  
#16 corticosteroid\*:ti,ab  
#15 'adrenal cortex hormone\*':ti,ab  
#14 'corticosteroid'/exp  
#13 steroid\*:ti,ab  
#12 'steroid'/exp  
#11 #1 OR #2 OR #3 OR #4 OR #5 OR #6 OR #7 OR #8 OR #9 OR #10  
#10 ards:ti,ab  
#9 acute AND respiratory AND distress AND syndrome:ti,ab

#8 adult AND respiratory AND distress AND syndrome:ti,ab

#7 'adult respiratory distress syndrome'/de

#6 hap:ti,ab

#5 cap:ti,ab

#4 pleuropneumon\*:ti,ab

#3 bronchopneumon\*:ti,ab

#2 pneumon\*:ti,ab

#1 'pneumonia'/ex

**Clinicaltrials.gov <inception to March 5th, 2020>**

Search strategy

(Corticosteroids OR steroids) AND Community-acquired Pneumonia (17 studies)
